# Supplementary material
Source: PubMed Central journal article supplement (PMC4019442)

**H2170**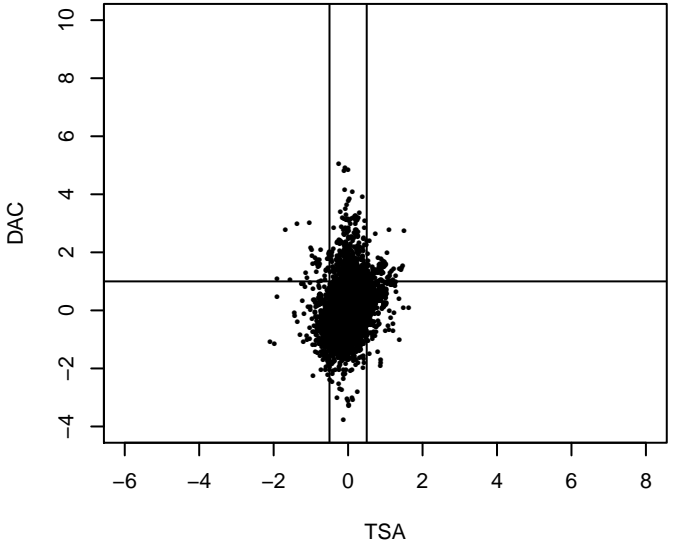**H520**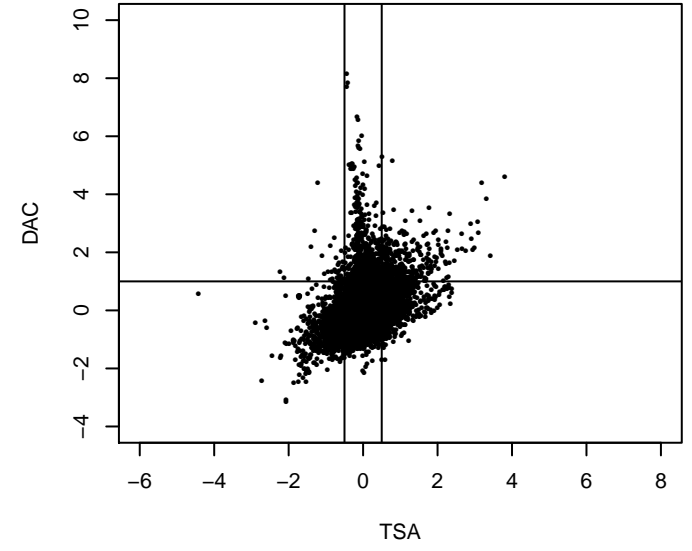**H23**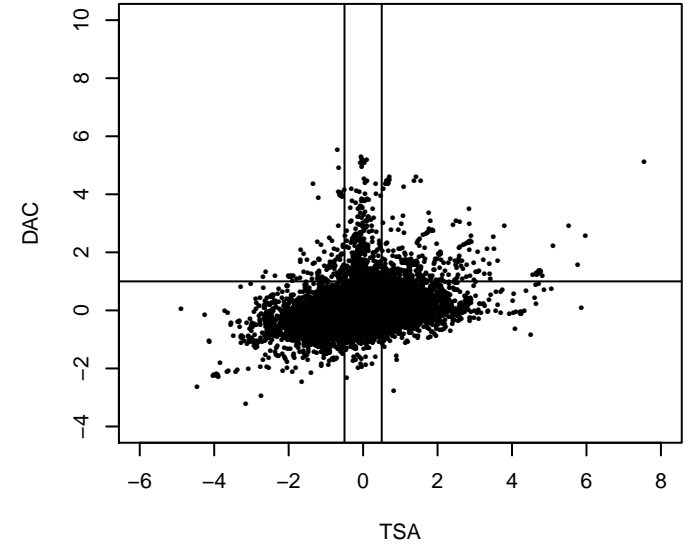**A838**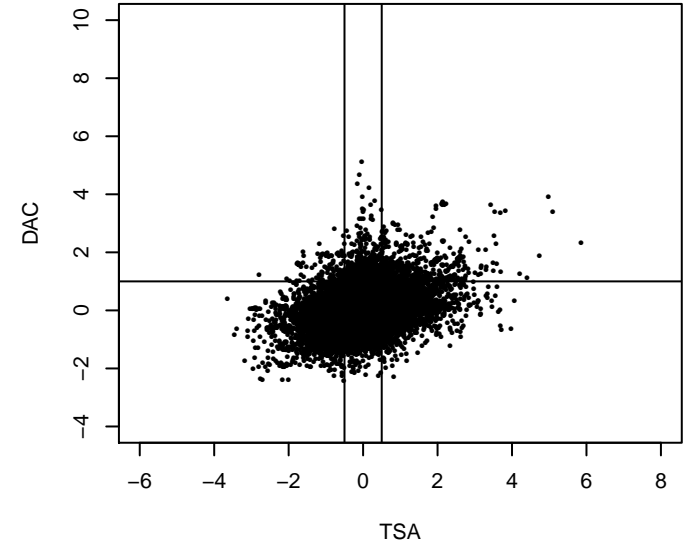**H1568**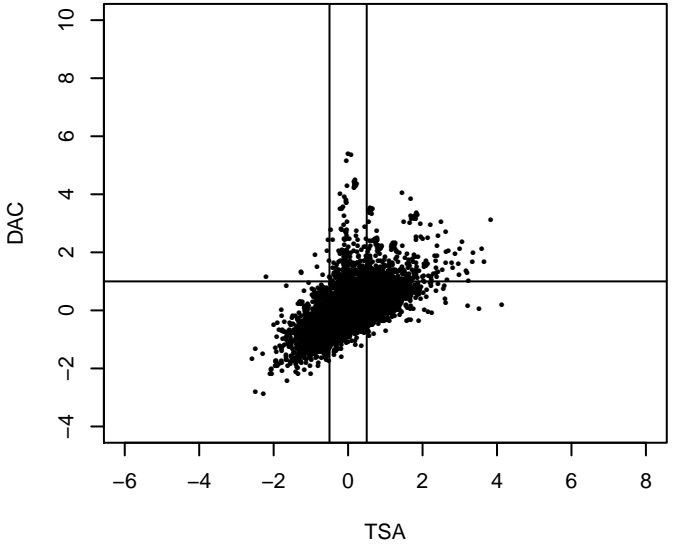**H1993**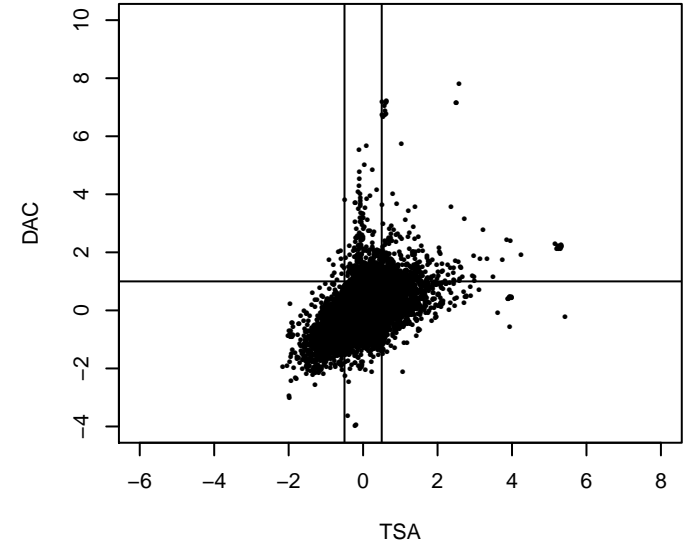**H1869**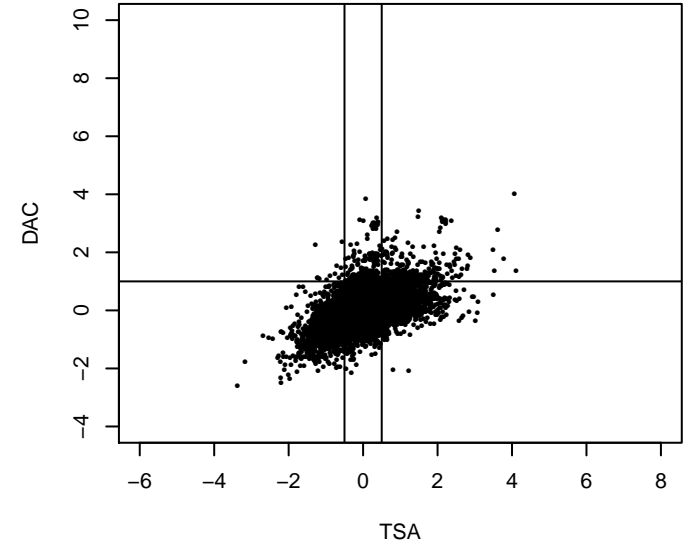**SKMES**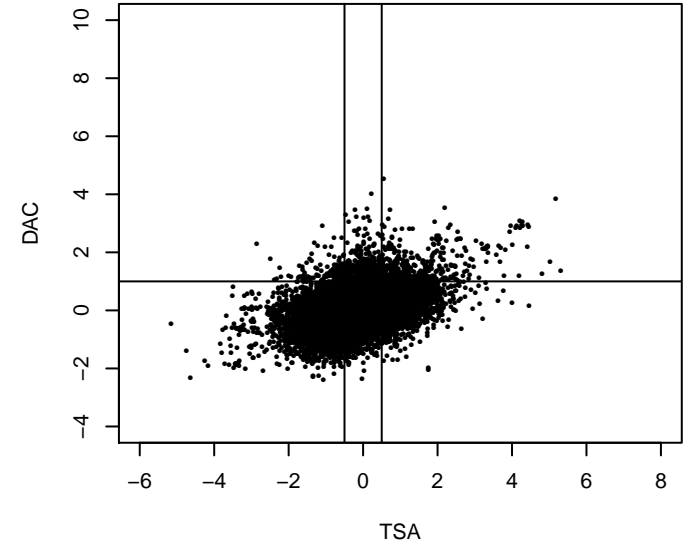

Supplement: NIHMS559575-supplement-2.pdf [file NIHMS559575-supplement-2.pdf]
